# Supplementary material for: Prescription Fills for Semaglutide Products by Payment Method
Source: PubMed Central journal article supplement (PMC11297375; doi:10.1001/jamahealthforum.2024.2026), 2024-08-02
Supplement: jamahealthforum-e242026-s001.pdf [file jamahealthforum-e242026-s001.pdf]

## Data Sharing Statement

Scannell. Prescription Fills for Semaglutide Products by Payment Method. *JAMA Health Forum*. Published August 02, 2024. doi:10.1001/jamahealthforum.2024.2026

### Data

**Data available:** No
